# Supplementary material for: Parallel analysis of transcription, integration, and sequence of single HIV-1 proviruses
Source: PubMed Central journal article supplement (PMC8809251; doi:10.1016/j.cell.2021.12.011), 2022-01-20
Supplement: mmc3.pdf [file mmc3.pdf]

**Table S3 (Related to STAR Methods): Oligonucleotide sequences used in PRIP-Seq assay**

| Workflow                | Amplicon/ Target (HXB2 Coordinates) | Round/ Orientation | Oligo Name                                          | Oligo Sequence (5'→3')                                                   |
|-------------------------|-------------------------------------|--------------------|-----------------------------------------------------|--------------------------------------------------------------------------|
| Proviral DNA Sequencing | Promoter (76-818)                   | 1F                 | 24F                                                 | CGAAGACAAGATATCCTTGATCTGTGG                                              |
|                         |                                     | 1R                 | 962R                                                | CTACAGCCTTCTGATGTTTCTAACAGG                                              |
|                         |                                     | 2F                 | 76F                                                 | CTGATTAGCAGAACTACACCAGG                                                  |
|                         |                                     | 2R                 | 818R                                                | CCGCTTAATACTGACGCTCTCG                                                   |
|                         | Promoter (367-643)                  | 1F                 | 350F                                                | GGGACTTTCCACTGGGGACTTTC                                                  |
|                         |                                     | 1R                 | 661R                                                | GCTTTCAGGTCCCTGTTCCGG                                                    |
|                         |                                     | 2F                 | 367F                                                | ACTTTCAGGGAGGCGTGG                                                       |
|                         |                                     | 2R                 | Kumar R                                             | GGGCGCCACTGCTAGAGA                                                       |
|                         | A1mod2 (638-2724)                   | 1F                 | U5-623F                                             | AAATCTCTAGCAGTGGCGCCCGAACAG                                              |
|                         |                                     | 1R                 | NE1                                                 | CCACTAACTTCTGTATGTCATTGACAGTCCAGCT                                       |
|                         |                                     | 2F                 | U5-638F                                             | GCGCCCCAACAGGGACYTGAAARCGAAAG                                            |
|                         |                                     | 2R                 | ProC-                                               | GAGTATTGTATGGATTTTCAGGCCCAAT                                             |
|                         | Pol (2011-3798)                     | 1F                 | 5CP1                                                | GAAGGGCACACAGCCAGAATTGCAGGG                                              |
|                         |                                     | 1R                 | RT3.1                                               | GCTCCTACTATGGGTTCTTCTCTAACTGG                                            |
|                         |                                     | 2F                 | 2.5                                                 | CCTAGGAAAAAGGGCTGTTGGAATGTGG                                             |
|                         | C (3626-5980)                       | 2R                 | RT3798R                                             | CAAACCCCCTCAGGAATCCA                                                     |
|                         |                                     | 1F                 | RT3597mixF                                          | AAAACAGGAAARTATGCAA                                                      |
|                         |                                     | 1R                 | SC05R                                               | AGCTTTCGTGCTGTCTCCGCTT                                                   |
| 2F                      |                                     | RT3626F            | TGCCCACACTAATGATGTAA                                |                                                                          |
| 2R                      |                                     | SC02R              | CTTCCTGCCATAGGAGATGCCTA                             |                                                                          |
| 1F                      |                                     | VP5450F            | CAGGACATAACAAGGTAGGATC                              |                                                                          |
| A2 (5550-7760)          | 1R                                  | CO602              | GCCCATAGTGCTTCCTGCTGCTCCCAAGAACC                    |                                                                          |
|                         | 2F                                  | VP5549F            | AGAGGATAGATGGAACAAGCCCCAG                           |                                                                          |
|                         | 2R                                  | V3CR               | TGCTCTTTTTTCTCTCTSCACCACT                           |                                                                          |
|                         | 1F                                  | GP41Fo             | TTCAGACCTGGAGGAGGAGATAT                             |                                                                          |
| B2 (7652-9610)          | 1R                                  | 3LTRi              | TCAAGGCAAGCTTTATTGAGGCTTAA                          |                                                                          |
|                         | 2F                                  | GP41Fi             | GGACAATTGGAGAAGTGAATTAT                             |                                                                          |
|                         | 2R                                  | 3UTRi              | AGGCTTAAGCAGTGGGTTCCCTAG                            |                                                                          |
|                         |                                     |                    |                                                     |                                                                          |
| Reverse Transcription   | Long LTR (643)                      | RT                 | Bio Long LTR                                        | /5BiotinTEG/AAGCAGTGGTATCAACGCAGAGTACGGGC<br>GCCACTGCTAGAGA              |
|                         | Pol (2662)                          | RT                 | Bio Pol                                             | /5BiotinTEG/AAGCAGTGGTATCAACGCAGAGTACCAAAT<br>TTCTACTAATGCTTTTTATTTTTTC  |
|                         | Nef (9040)                          | RT                 | Bio Nef                                             | /5BiotinTEG/AAGCAGTGGTATCAACGCAGAGTACTGTAA<br>GTCATTGGTCTTAAAGGTACCTGAGG |
|                         | PolyA (9635+25)                     | RT                 | Bio PolyA                                           | /5BiotinTEG/AAGCAGTGGTATCAACGCAGAGTACTTTTT<br>TTTTTTTTTTTTTTTTTTTTTTGAAG |
|                         | Tat-Rev (8459)                      | RT                 | Bio Tat-Rev                                         | /5BiotinTEG/AAGCAGTGGTATCAACGCAGAGTACGGATC<br>TGCTCTGTCTCTCTCTCCACC      |
|                         | Read-through (582; 9667)            | RT                 | Bio Readth                                          | /5BiotinTEG/AAGCAGTGGTATCAACGCAGAGTACAGAGT<br>CACACAACAGACGG             |
| cDNA Amplification      | NA                                  | NA                 | Template-switching oligo (TSO)                      | AAGCAGTGGTATCAACGCAGAGTACATrGrG+G-3                                      |
|                         | NA                                  | NA                 | ISPCR                                               | AAGCAGTGGTATCAACGCAGAGT                                                  |
| cDNA ddPCR              | Long LTR (522-643)                  | F                  | Kumar F                                             | GCCTCAATAAAGCTTGCCTTGA                                                   |
|                         |                                     | R                  | Kumar R                                             | GGGCGCCACTGCTAGAGA                                                       |
|                         |                                     | R (alternate)      | 625R                                                | TTTTCCACACTGACTAAAAGGGTC                                                 |
|                         |                                     | Probe              | Kumar P                                             | /56-FAM/CCAGAGTCA/ZEN/CACAACAGACGGGCACA/<br>3IABkFQ/                     |
|                         | Pol (2536-2662)                     | F                  | Pol mf299                                           | GCACTTTAAATTTCCCATTAGTCTTA                                               |
|                         |                                     | R                  | Pol mf1                                             | CAAATTTCTACTAATGCTTTTATTTTTTC                                            |
|                         |                                     | Probe              | Pol P                                               | /56-FAM/AAGCCAGGA/ZEN/ATGGATGGCC/3IABkFQ/                                |
|                         | Nef (8883-9040)                     | F                  | F8883-03                                            | GGTGGGAGCAGYATCTCGAGA                                                    |
|                         |                                     | R                  | R9040-10                                            | TGTAAGTCATTGGTCTTAAAGGTACCTGAGG                                          |
|                         |                                     | Probe              | P8967-50                                            | /56-FAM/CCAGGCACA/ZEN/AKCAGCATT/3IABkFQ/                                 |
| PolyA (9496-9635+25)    | F                                   | Freadth-2          | GCCCTCAGATGCTRCATATAA                               |                                                                          |
|                         | R                                   | 5T25               | TTTTTTTTTTTTTTTTTTTTTTTTTTGAAG                      |                                                                          |
|                         | Probe                               | Preadth-1          | /56-FAM/TGCCTGTAC/ZEN/TGGGTCTCTGTGTTAG/<br>3IABkFQ/ |                                                                          |
| Tat-Rev (5956-8459)     | F                                   | mf1                | CTTAGGCATCTCCTATGGCAGGAA                            |                                                                          |

|  |                                      |       |           |                                                      |
|--|--------------------------------------|-------|-----------|------------------------------------------------------|
|  |                                      | R     | mf83      | GGATCTGTCTCTGTCTCTCTCTCCACC                          |
|  |                                      | Probe | Mf226mod  | /56-FAM/ACCCGACAG/ZEN/GCC/3IABkFQ/                   |
|  | Read-through<br>(411-582; 9496-9667) | F     | Freadth-2 | GCCCTCAGATGCTRCATATAA                                |
|  |                                      | R     | Rreadth-1 | AGAGTCACACAACAGACGG                                  |
|  |                                      | Probe | Preadth-1 | /56-FAM/TGCCTGTAC/ZEN/TGGGTCTCTCTGGTTAG/<br>3IABkFQ/ |
